# Supplementary material for: The concurrence of DNA methylation and demethylation is associated with transcription regulation
Source: PubMed Central journal article supplement (PMC8421433; doi:10.1038/s41467-021-25521-7), 2021-09-06
Supplement: 41467_2021_25521_MOESM3_ESM.pdf [file 41467_2021_25521_MOESM3_ESM.pdf]

## **Description of Additional Supplementary Files**

File Name: Supplementary Data 1

Description: Datasets used in this study

File Name: Supplementary Data 2

Description: Lists of genes repressed by promoter methylation concurrence-elevation, hypermethylation, or both of them in uterus tumor

File Name: Supplementary Data 3

Description: List of methylation canyons and their target genes in CD3+ T-cells

File Name: Supplementary Data 4

Description: List of 'methyl-plus' and 'methyl-minus' motifs used in this study. Enrichment at aCanyon and pCanyon in CD3+ T-cells is indicated.
